# Supplementary material
Source: PubMed Central journal article supplement (PMC5339834)
Supplement: cr201715x1.pdf [file cr201715x1.pdf]

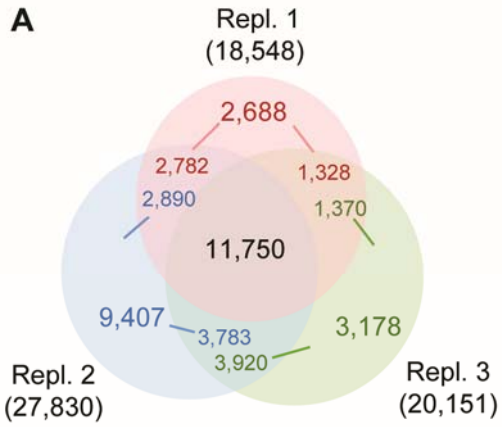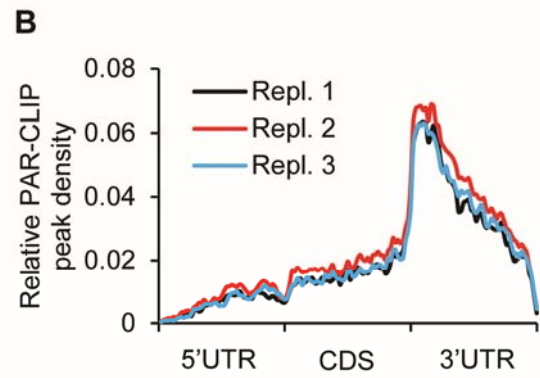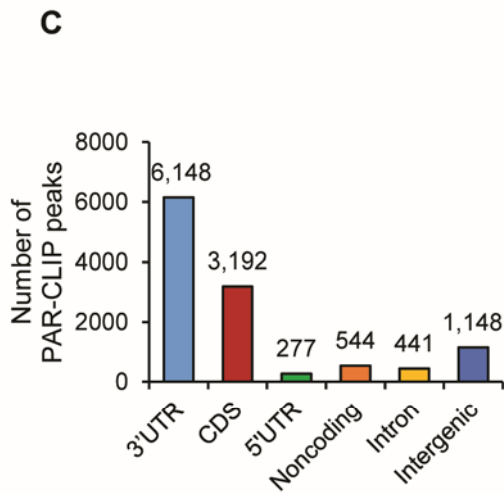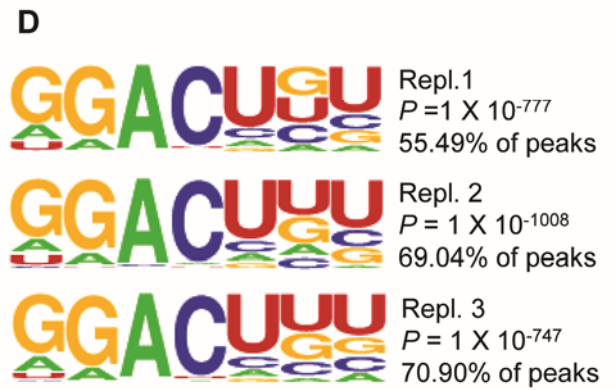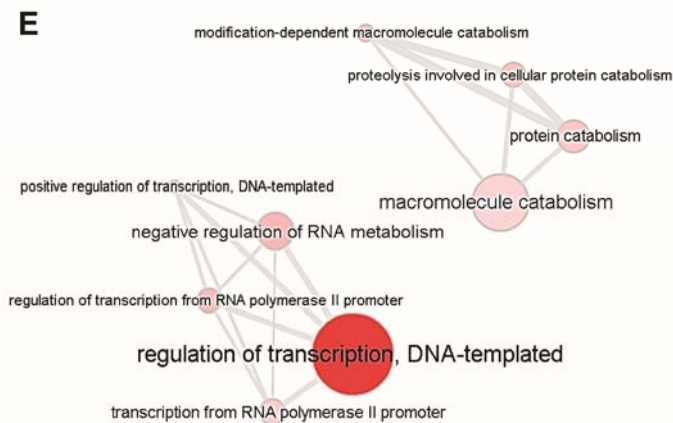

**Supplementary information, Figure S1** Analyses of YTHDF3 PAR-CLIP data. **(A)** Overlap of YTHDF3 PAR-CLIP peaks in biological triplicates with 11,750 common peaks identified. **(B)** Distribution of PAR-CLIP peaks from each replicate along the length of mRNA. **(C)** Region distribution of common peaks from YTHDF3 PAR-CLIP triplicates. **(D)** YTHDF3-binding motif identified from PAR-CLIP peaks in each replicate. *P* values and the percentage of peaks with the motif were indicated. **(E)** Gene Ontology (GO) analysis of top 500 target genes shared in PAR-CLIP and RIP-seq of YTHDF3 with DAVID 6.7 [49, 50]. GO terms with  $p < 0.001$  were visualized with REVIGO [51].
