# Supplementary material
Source: PubMed Central journal article supplement (PMC5339834)
Supplement: cr201715x2.pdf [file cr201715x2.pdf]

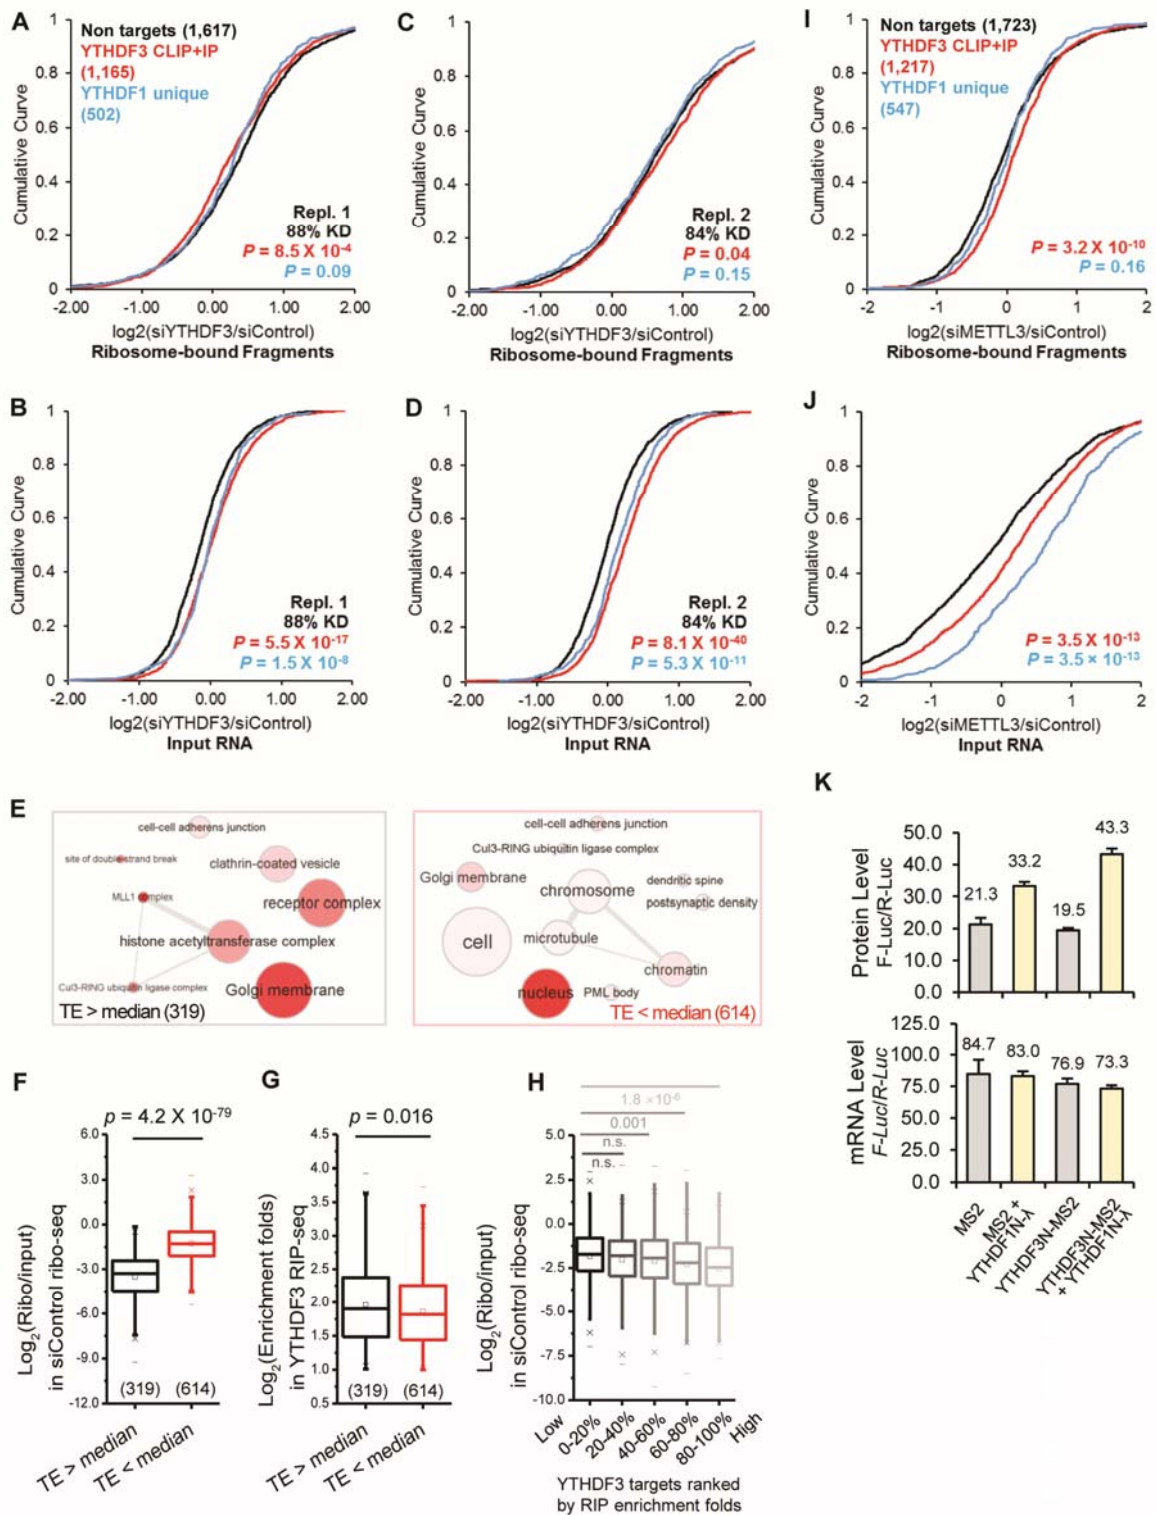

**Supplementary information, Figure S2** Ribosome profiling and polysome profiling of HeLa cells depleted of YTHDF3 (**A-J**), and protein and mRNA levels of reporters in the double tethering assay (**K**). (**A-D, I-J**) Cumulative distribution of  $\log_2$ -fold changes of ribosome-bound fragments (**A, C, I**) and input RNA (**B, D, J**) between siControl and siYTHDF3, replicate 1 (**A-B**), siYTHDF3, replicate 2 (**C-D**), and siMETTL3 (**I-J**). Non-targets, black; YTHDF3 CLIP+IP targets, red, and YTHDF1 unique targets, blue. *P* values were calculated from a two-sided Mann-Whitney test compared to non-targets. (**E**) Gene Ontology (GO) analysis with DAVID 6.7 [49,50] of the group of genes with increased translation efficiency ( $TE > \text{median}$ ) and that with decreased translation efficiency ( $TE < \text{median}$ ) in absence of YTHDF3. GO terms with  $p < 0.05$  were visualized with REVIGO[51]. (**F-G**) Box plot of translation efficiency ( $\text{Log}_2(\text{Ribo}/\text{input})$ ) in knockdown control samples (**F**) and YTHDF3 RIP enrichment folds (**G**) of these two groups of genes. Box, 25-75%; “–”, max and min; “×”, 1% and 99%; “□”, median. *P* values were calculated from a two-sided Mann-Whitney test. (**H**) Box plot of the correlation between YTHDF3 RIP enrichment folds and translation efficiency in siControl samples. Box, 25-75%; “–”, max and min; “×”, 1% and 99%; “□”, median. *P* values were calculated from a two-sided Mann-Whitney test compared to the “0-20%” group. (**K**) Normalized protein level and mRNA level of F-Luc 4-hour post F-Luc induction with the expression of effectors indicated in the double tethering assay. Error bars, mean  $\pm$  s.d.,  $n = 2\sim 4$ .
