# Supplementary material
Source: PubMed Central journal article supplement (PMC5339834)
Supplement: cr201715x3.pdf [file cr201715x3.pdf]

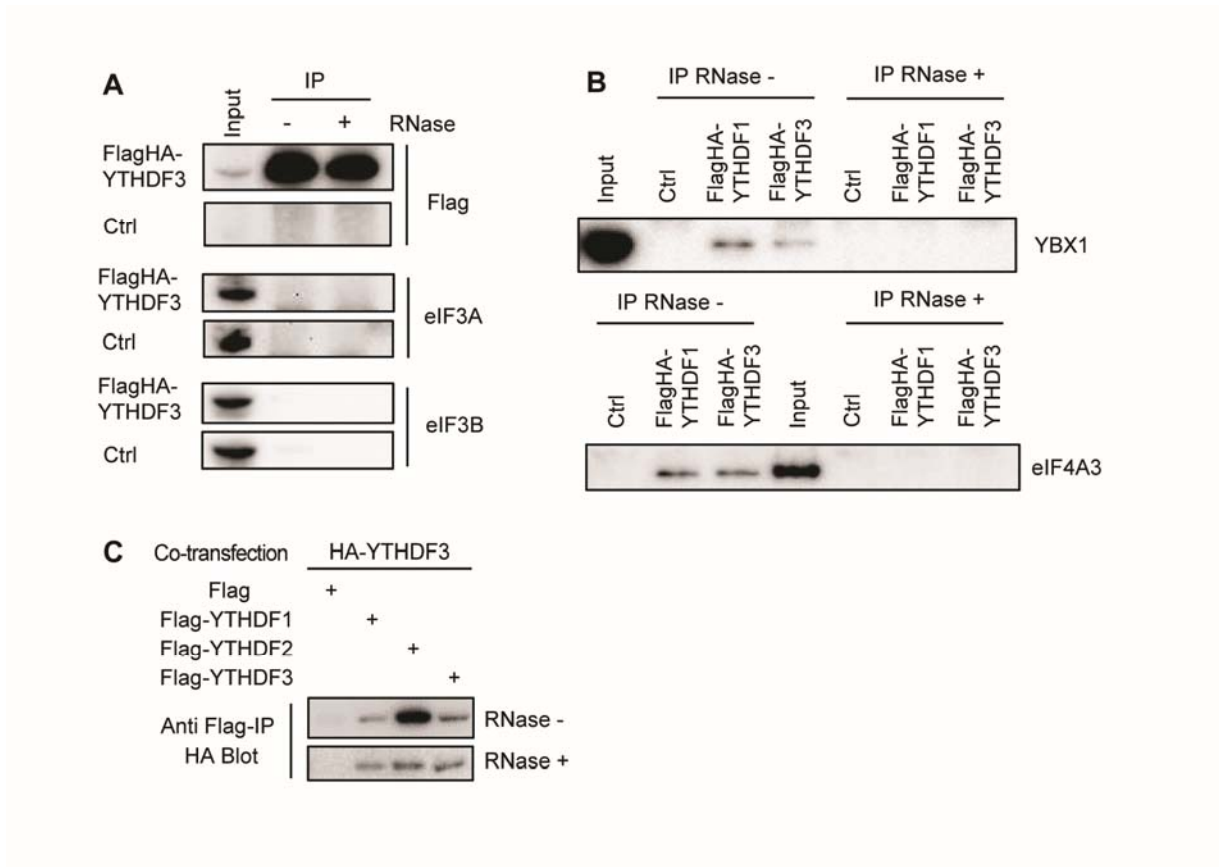

**Supplementary information, Figure S3** YTHDF3 and YTHDF1 co-immunoprecipitate and share protein partners. **(A)** Western blotting showed no visible presence of eIF3A nor eIF3B in the proteins co-immunoprecipitated (IP) with YTHDF3. Ctrl, the Flag-HA expression control sample. **(B)** Western blotting showing YBX1 and eIF4A3 were co-immunoprecipitated (IP) with both YTHDF1 and YTHDF3 in an RNA-dependent manner. **(C)** Western blotting showing that YTHDF3 co-immunoprecipitated with YTHDF1 and YTHDF2 in a RNA-independent way. HeLa cells were co-transfected with a combination of Flag-tagged YTHDFs and HA-tagged YTHDF3. HA-tagged YTHDF3 were western blotted in the eluent of anti-Flag immunoprecipitation (IP).
