# Supplementary material
Source: PubMed Central journal article supplement (PMC5339834)
Supplement: cr201715x4.pdf [file cr201715x4.pdf]

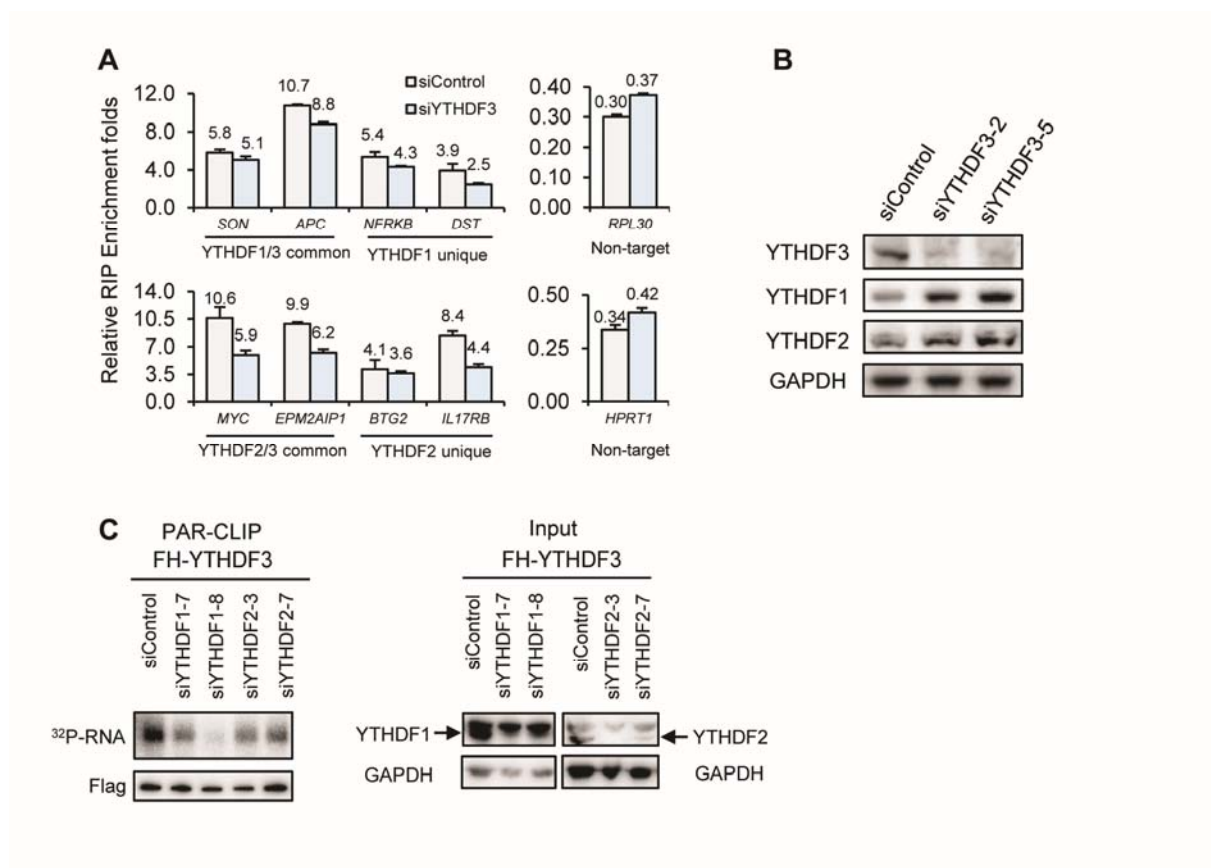

**Supplementary information, Figure S4** YTHDF3 regulates binding specificity and affinity of YTHDF1 and YTHDF2 towards target RNAs. **(A)** Quantification of Flag-HA YTHDF1 (top) and Flag-HA YTHDF2 (bottom) RNA immunoprecipitation efficiency upon depletion of endogenous YTHDF3. Representative target transcripts co-immunoprecipitated with Flag-HA-YTHDF1 or Flag-HA-YTHDF2 were quantified with RT-qPCR and normalized to their amounts in input RNA. Error bars, mean  $\pm$  s.d.,  $n = 2$ , technical replicates. **(B)** Western blotting showing that knockdown of YTHDF3 leads to upregulated protein levels of YTHDF1 and YTHDF2 in wild-type HeLa cells. **(C)** Total RNAs bound by YTHDF3 quantified with PAR-CLIP followed by  $5'$ - $^{32}\text{P}$  labelling in the control HeLa cells and cells depleted of either YTHDF1 or YTHDF2 (left panel). Western blot showing knockdown efficiency of the siYTHDF1 and siYTHDF2 oligos (right panel).
